# Supplementary material for: How frames and narratives in press releases shape newspaper science articles: the case of ocean plastic pollution.
Source: Copernicus journal article supplement (doi:10.5194/egusphere-2025-2216), 2025-05-28
Supplement: Supplementary file [file egusphere-2025-2216-AC2-supplement.pdf]

## Reaction to Review 2 of manuscript: How frames and narratives in press releases shape newspaper science articles: the case of ocean plastic pollution.

I think you have written a very interesting paper that fits nicely within the journal. I have had the great pleasure to review this and wish to stress that the comments are minor, meaning I hope to see this manuscript published soon. The paper is a unique and useful addition to the literature (as there is indeed limited knowledge on press releases (and their frames) and associated news articles). Below you'll find comments related to literature, structure and more general reflections.

Dear Miguel, thank you for your kind words on our manuscript and for taking the time to provide us with your valuable feedback. Your detailed comments and section-by-section suggestions have been helpful in refining the paper, and in this response we address each of them. In our response, we have italicized all the information from the manuscript, the text that has been added is highlighted in red and we have added your feedback in blue.

### INTRODUCTION

I think you clearly sketch the relevance of the research and excite the reader to keep on reading.

Thank you for your kind words, we are happy to hear that you want to keep on reading due to the introduction.

Line 33-35: Maybe rephrase the sentence a bit. I struggled to understand the sentence due to it starting with 'as'.

You are right, the sentence is a bit hard to follow. We have rewritten it more clearly by taking the last sentence of the paragraph to the beginning:

*The media play an important role in shaping public understanding on ocean issues. They are a major source of information about marine science influence how risks, at least with regard to microplastics, are perceived among the public (Kramm et al., 2022). Although public awareness of ocean issues is increasing, perceptions of the most pressing threats often differ from those of scientists. For example, while the public often identify ocean pollution as their greatest concern, scientists are more likely to highlight climate change as the most urgent problem (Lotze et al., 2018). Scientists suggest that the disproportionate media coverage of ocean plastic, compared to other areas of ocean science (Pinto et al., 2020; Thompson-Saud et al., 2018), may have contributed to this gap in perception (Tiller et al., 2019).*

Line 45-50: Good relevance sketch. Could be combined with the last paragraph of the introduction (94-100).

Thank you for We have deleted the last paragraph of the introduction (lines 94-100) and added this information at the beginning of the paragraph (94-100). We have re-written the text as follows:

*In this study, we examine how scientific knowledge about ocean plastic spreads from research institutions to the public, focusing on the role of press releases in shaping media messages. Ocean plastic research forms a suitable case study because it is highly visible in both scientific communication and public discourse. While multiple studies show how ocean plastic is framed in public media, less attention has been given to the origins of these frames. Our study fills this gap, and explores contextual shifts among press releases and subsequent newspaper articles, by examining changes in framing and narrative strategies. By comparing how framing is used in both press release and newspaper article, we can better understand the role of the press release in frame construction. Furthermore, analysis of narratives, actors and quotes provides information about the social context in which ocean plastic research is placed and the people deemed important in the conversation about ocean plastic pollution.*

Line 52-59: Repetition of the word 'challenges' and 'challenging'

Based on the feedback of Anna and your feedback, we have re-written the paragraph:

*Understanding the impacts of ocean problems, like ocean plastic, can be challenging for people, as ocean problems are deeply interconnected and influenced by multiple stressors, making it difficult to isolate and fully understand the impact of a single issue (Kelly et al., 2022). Moreover, ocean science often requires the use of complex biological, chemical and physical methods. Understanding these methods can be complicated as they require a relatively large amount of prior knowledge to comprehend it properly. Additionally, the ocean, and particularly the deep sea, is largely invisible and physically remote, contributing to a sense of detachment and making it harder for the public to perceive its relevance to society (Schuldt et al., 2016). These communication challenges highlight the important role of journalists in making ocean science accessible to the public.*

Line 61: I'm not fully convinced of the importance of journalists based on your text yet. Maybe better to combine it with the next paragraph and truly stress the importance of these journalists.

Thank you for this observation, we have followed your advise and combined the information about the importance and the role of journalists in translating scientific information to the public with the following paragraph. We have re-written the text as follows:

*Effectively communicating ocean science to the general public requires translating complex research into content that is accessible and meaningful for newspaper readers. In doing so, journalists encounter a number of challenges. In several European countries, journalists report that ocean science receives limited attention in newspapers, partly due to understaffed newsrooms and a shortage of specialized science reporters. Additionally, the complexity and technical nature of ocean science makes it difficult to accurately interpret research findings. Journalists often emphasize the need to consult directly with scientists to clarify and verify information, but such access is not always feasible. Time pressures further complicate their work, leaving journalists with little opportunity for in-depth investigation. As a result, they tend to rely more heavily on easily accessible international sources, often copying content related to ocean issues (Pinto & Matias, 2023).*

Line 68-70: A bit off topic. Could be removed for me.

We agree with you, we also don't refer to this information in our discussion. Hence, we have removed the following section:

*Science journalism can additionally expose abuses such as unethical funding, plagiarism or methodological errors by taking a critical stance towards scientific claims and distinguishing between reliable and less reliable research (Fahy & Nisbet, 2011; 70 Lexchin, 2003; Murcott & Williams, 2013).*

Line 86: Maybe already explain the difference between narratives and frames a bit (not necessary however).

Thank you for this helpful suggestion. We have chosen not to elaborate on the difference between narratives and frames at this early point in the manuscript to maintain a clear and concise introduction. Instead, we explain both concepts in detail in the subsequent sections (2.1 and 2.2), where they are each introduced and contextualized more fully. We believe this placement avoids redundancy and allows for a more structured development of our theoretical framework.

## THEORETICAL FRAMEWORK

Again, a strong outline of what is known and what you could add to the literature. Well done!

Thank you Miguel, for the positive evaluation of the theoretical framework. We are pleased to hear that you think we have provided a strong outline of the existing literature.

Line 107: The emphasis on 'how' threw me off a little bit. Framing always feels like a 'how', meaning I didn't truly understand the specific emphasis you wish to make or what the specific contrast is with the previous lines.

Thank you for your observant reading. The *how* should not have been in italic. We have written it without the emphasis.

Line 124-135: Very nice explanation of narratives. Just 'personalization' feels a bit out of balance due to the extra paragraph below (136-144). Maybe emphasize why personalization is big or combine 136-150. Also: be consistent with 'personalisation' or 'personalization'.

Thank you for this observation. We have revised the text to consistently use the spelling "personalization." We also understand that the emphasis on personalization previously felt unbalanced. To address this, we have merged the two paragraphs (lines 136–150) to ensure a more even and integrated discussion of narrative elements.

Line 155: 'And' between RQ's not necessary

We have deleted the 'And' between the RQ's.

Line 160: "How audiences perceive and respond to information". A question: Isn't this also the case with frames and narratives and not just the tone?

Thank you for this helpful comment. You are absolutely right, audiences' perceptions are shaped not only by tone but also by framing and narrative elements. We have revised the sentence on line 160 to clarify that all three elements, frames, narratives, and tone, play a role in influencing how readers interpret and respond to environmental information.

We have rewritten the line into: *"Story tone, along with frame- and narrative elements, can influence how audiences perceive and respond to information about environmental issues."*

Line 164: Definitely true that news has a 'negativity bias'. Nevertheless, Harcup and O'Neill also identify positive news. Maybe good to look at Caple & Bednarek (2016), as they are a bit closer to framing and discourse? Or Badenschier and Wormer (2012) for news values x science news? Just a tip!

Thank you for this valuable tip. You are right that these sources strengthen the theoretical background. Based on your feedback, we have revised this section to clarify the rationale behind our research question and to better integrate the relevant literature. We have re-written the paragraph as follows:

*Story tone, along with frame- and narrative elements, can influence how audiences perceive and respond to information about environmental issues. In the context of ocean health, positive messaging has been shown to promote public engagement and support for environmental action (Kelly et al., 2022), as optimistic stories can inspire hope and highlight opportunities for recovery (McAfee et al., 2019). While press releases on ocean plastic research show a range of tones, negative, neutral, positive or passionate (Vonk et al., 2024a), press releases highlighting more negative aspects of pollution are more often followed up by newspaper articles (Vonk et al., 2024b). It is important to understand how negative messages about the ocean come about in public discourse, as scientists have raised concerns that a consistently pessimistic portrayal of ocean health in the media may discourage public engagement by reinforcing the perception that ocean degradation is irreversible (Duarte et al., 2015). It is well known that news selection criteria can create a bias towards negative news. Although science journalists report that tone is not a primary newsworthiness criterion in science news selection (Badenschier & Wormer, 2012), negativity remains a dominant news value in wider journalism (Bednarek & Caple, 2014). At the same time, positive news also plays a role in selection processes (Harcup & O'Neill, 2017), suggesting that both uplifting and alarming stories can attract media attention, depending on the context. While it is known that tone can affect what is selected as news, less is known about*

*how the tone of press releases affects the tone of subsequent coverage in newspapers, a question we aim to answer in this study.*

Line 169-171: This explicit background regarding press releases is not given with other RQ's and is not necessary here, for me. You could leave it out.

Good to hear that it is also clear without the extra information, we have deleted the explanation.

## RESULTS

I have close to no remarks on the result section, as I feel you have truly taken a unique approach (especially the figures) and have clearly explained what you found.

Thank you very much for your positive feedback on the results section. We greatly appreciate your kind words regarding the clarity of the findings and the use of figures and we are glad to hear that the approach came across as both clear and unique.

Line 337: COVID-19\*-related plastic waste

Thank you for your observant reading, we have adjusted the text to: COVID-19-related plastic waste

Line 324-372: Just an idea! The result section reads a bit repetitive and maybe it would be good to combine the responsibility for causing and mitigating (as I was a bit confused on the first read), e.g. responsibility country cause x responsibility country mitigation. Just an idea, though.

Thank you for this suggestion. We understand that the section may come across as somewhat repetitive, especially because the concepts of *responsibility for causing* and *responsibility for mitigating* are closely related in name. However, we have deliberately chosen to present them separately, as they represent distinct frame variables with different implications. Combining them might obscure the nuance between attribution of blame and attribution of responsibility for action. For that reason, we have decided to keep the structure of the results section unchanged, to ensure conceptual clarity.

Line 384: Explicitly mention dramatization

Good idea, the inverted pyramid style is a measure for dramatization. Thank you for pointing this out, we have now incorporated dramatization in the explanation:

*Figure 2 shows that almost all press releases and newspaper **articles have little dramatization**, as they almost all use the inverted pyramid style, highlighting key findings in advance.*

Line 401-405: These lines are quite similar to the previous paragraph. How do you argue the difference between e.g. a negative tone and emotional (negative) narrative elements?

Thank you for pointing this out. We agree that the concepts of emotional narrative elements and tone are closely related, but they refer to distinct aspects of a text. We have clarified their distinction in the discussion section as follows:

*Importantly, we found that the tone of newspaper articles was strongly influenced by the tone set in the press releases, particularly through the reuse of emotional quotes. In many cases, quotes expressing concern, optimism, or passion were directly copied from press releases, thereby shaping the story tone of the final newspaper article. **Although the concepts of emotional narrative elements and tone are closely related, they refer to distinct aspects of a text. Emotional (negative) narrative elements specifically refer to the emotions expressed by actors within the story, for example, a scientist expressing frustration or concern. In contrast, the tone of the story refers to the overall emotional impression it creates for the reader, which can arise not only***

*from the emotions of characters but also from how the issue is framed. We found for example, that a text that emphasizes environmental decline without directly quoting emotional reactions can still convey a negative tone.*

Line 437: Any idea why newspapers have a broader array of actor roles?

Thank you for this observation. One possible explanation for why newspapers include a broader array of actor roles is that they communicate scientific findings within the public sphere and aim to highlight their relevance to people's daily lives. By referencing local actors, political figures, or specific policy contexts, journalists can connect the research to broader societal debates and public concerns. In doing so, non-scientific actors become important narrative elements that help frame the story in terms of its social and political implications. While scientific press releases may point to the responsibilities of politics or broader governance, they tend to avoid naming specific political actors, probably because they focus on their own institution and keep the press releases broad in topic.

## CONCLUSION AND DISCUSSION

You give a good conclusion and reflect on how your results fit within the literature in a proper manner. At certain parts I feel you could be a bit more normative (although you don't have to be) and expand on certain points.

Line 501-515: Could be used as a lead up to the 'ethical messaging' part. I feel the ethical messaging is a very important aspect of what you found (with the influence of press releases and the limited 'power' of journalists). I would therefore expand 529-540 a bit more. Focus on the responsibility of research institutes & their communication and perhaps add some more sources (e.g. Fürst et al, 2022) and see also Sumner et al. 2014 "our principle findings were that most of the inflation detected in our study did not occur de novo in the media but was already present in the text of the press releases produced by academics and their establishments".

Thank you for your suggestions and for pointing us toward relevant sources. You are right that the role of universities and research institutions in disseminating science news deserves more attention. The fact that press releases often serve public relations goals was underrepresented in our original discussion. Based on your feedback, we have expanded this part as follows:

*In recent years, the communication departments of research institutions, including universities, have intensified their engagement with the media (Autzen, 2014). This shift is not solely aimed at disseminating scientific knowledge; in many cases, it also serves institutional goals such as building public reputation and visibility (Fürst et al., 2022). Hence, press releases are not only meant to communicate science, but also have clear public relation goals (Carver, 2014). When public relations objectives take the overhand, there is a risk that scientific nuance and caution are lost in favor of more appealing or sensational narratives. This dynamic has been well documented in health communication, where exaggerations found in press releases often translate directly into similarly exaggerated media coverage (e.g. Sumner et al., 2014, Bossema et al., 2019). This underscores the ethical responsibility of research institutions to ensure that their press releases present accurate, balanced, and contextualized representations of scientific findings. Given the strong influence press releases have on media coverage, as also shown in our results, research institutions should be seen as active agents in shaping public understanding of science. Their role goes beyond facilitating media uptake; it includes a responsibility to support truthful, nuanced, and socially responsible science communication.*

## APPENDIX

Line 595: Don't you mean you compared the content of all news articles, not press releases?

Thank you for your observant reading. We indeed mean newspaper articles. We have changed the text in the discussion accordingly.

Great work! Thank you for the opportunity to read and review this. And thank you for your valuable addition to the literature.

Thank you, Miguel, for your thorough reading and valuable feedback. Your suggestions have helped strengthen the manuscript. We also appreciate your kind words and are grateful for the opportunity to contribute to this area of research.
